# Supplementary material
Source: Research Square preprint supplement (doi:10.21203/rs.3.rs-8897368/v1)
Supplement: Supplementary file 1 [file 76521f9045bff644bdc2a994.docx]

**Appendix A. Sensitivity Analysis with 1/3-Mile Buffer to be consistent with HTRZ Policy**

Table A1: Year-wise Adjusted Household Income and Racial Composition of Households Moving into and out of LRT Station Areas (Sensitivity Test).

| **Analysis Year** | **Moving out of Station Areas** | | | **Moving into Station Areas** | | |
| --- | --- | --- | --- | --- | --- | --- |
| Number of Households (% of County) | Households' Income-Mean (SD) | % Non-white Households | Number of Households (% of County) | Households' Income-Mean (SD) | % Non-white Households |
| 2012-2013 | 518 (1.53%) | $15431.24 ($15447.21) | 22 | 353 (1.05%) | $25130.17 ($20163.02) | 21 |
| 2013-2014 | 671 (1.57%) | $16352.85 ($15401.74) | 25 | 425 (0.99%) | $20954.54 ($15913.13) | 26 |
| 2014-2015 | 650 (1.82%) | $22528.71 ($17258.84) | 20 | 417 (1.17%) | $31995.01 ($23477.14) | 25 |
| 2015-2016 | 700 (2.13%) | $18765.37 ($14738.98) | 24 | 363 (1.10%) | $27246.67 ($21691.67) | 26 |
| 2016-2017 | 563 (1.48%) | $27619.18 ($19048.26) | 30 | 300 (0.79%) | $40884.00 ($28357.43) | 24 |
| 2017-2018 | 1050 (2.56%) | $28807.73 ($20833.99) | 23 | 619 (1.51%) | $39035.32 ($29519.93) | 25 |
| 2018-2019 | 839 (1.78%) | $32158.88 ($27559.91) | 26 | 759 (1.61%) | $37568.18 ($26493.38) | 25 |
| 2019-2020 | 901 (1.57%) | $36938.83 ($26142.43) | 23 | 705 (1.23%) | $41348.38 ($26578.02) | 25 |
| 2020-2021 | 1067 (1.88%) | $32206.04 ($25628.86) | 27 | 768 (1.35%) | $45984.17 ($39598.38) | 27 |
| 2021-2022 | 1332 (2.66%) | $35114.80 ($22505.38) | 26 | 502 (1.00%) | $39225.52 ($32482.04) | 29 |

Table A2: Number of low, very low, and extremely low-income households moved in and out of Station Areas (2012 to 2022)(Sensitivity Test)

| **Analysis Year** | **Moved out** | | | **Moved in** | | |
| --- | --- | --- | --- | --- | --- | --- |
| Low Income | Very Low Income | Extremely Low Income | Low Income | Very Low Income | Extremely Low Income |
| 2012-2013 | 25 | 74 | 400 | 64 | 85 | 176 |
| 2013-2014 | 52 | 81 | 498 | 67 | 109 | 225 |
| 2014-2015 | 100 | 178 | 334 | 92 | 101 | 145 |
| 2015-2016 | 53 | 157 | 452 | 60 | 107 | 153 |
| 2016-2017 | 132 | 140 | 232 | 71 | 63 | 76 |
| 2017-2018 | 216 | 267 | 415 | 162 | 115 | 184 |
| 2018-2019 | 198 | 227 | 294 | 186 | 150 | 229 |
| 2019-2020 | 229 | 208 | 263 | 194 | 161 | 154 |
| 2020-2021 | 249 | 265 | 379 | 251 | 161 | 140 |
| 2021-2022 | 378 | 318 | 376 | 131 | 109 | 151 |


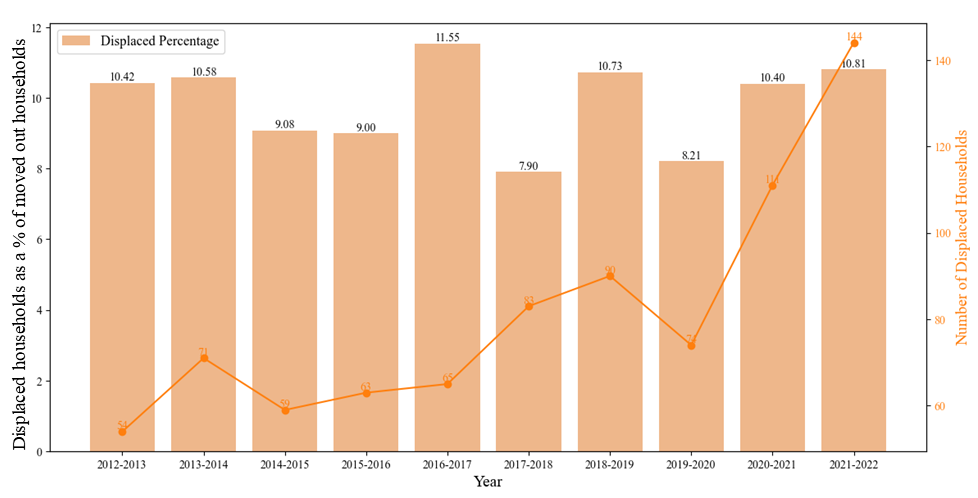


Figure A1:Year-wise number and percentage of displaced from station areas (Sensitivity Test)

b. Moving out of station areas- displaced renter households

c. Moving into station areas- (all renter households)

a. Moving-out of station areas- (all renter households)


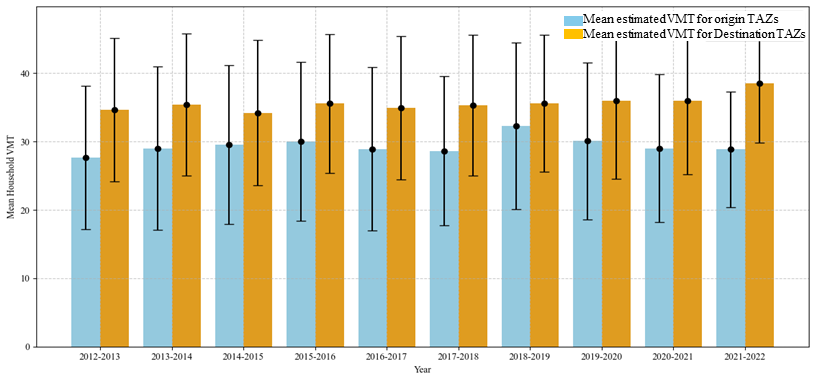

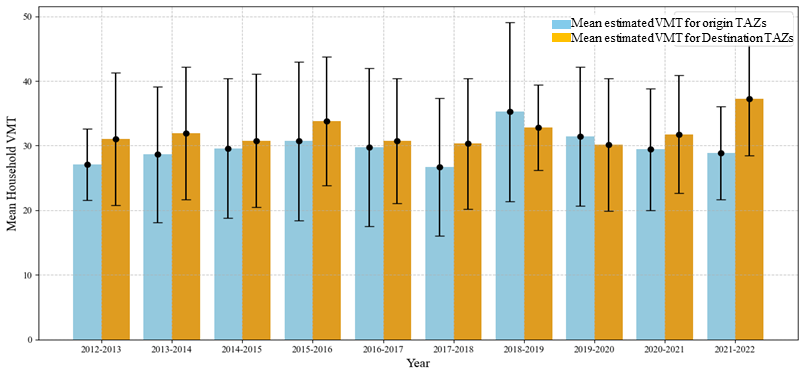

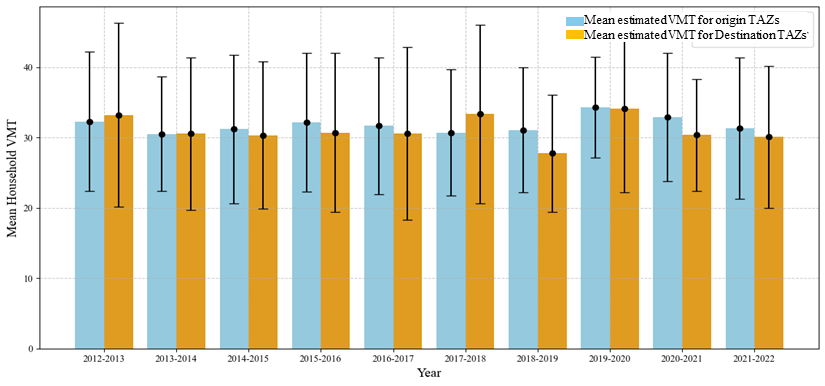


Figure A2:Year-wise pre- and post-move mean VMT for (a) all renter-households moving out; (b) displaced renter-households moving out; and (c) all renter-households moving into station areas (Sensitivity Test)

b. Moving out of station areas- displaced renter households

c. Moving into station areas- (all renter households)

a. Moving-out of station areas- (all renter households)


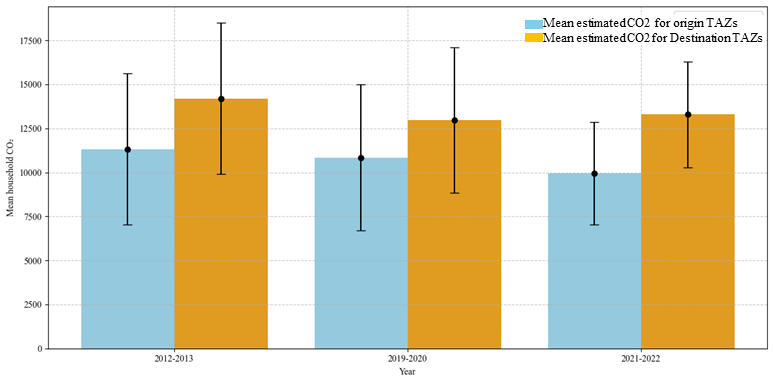

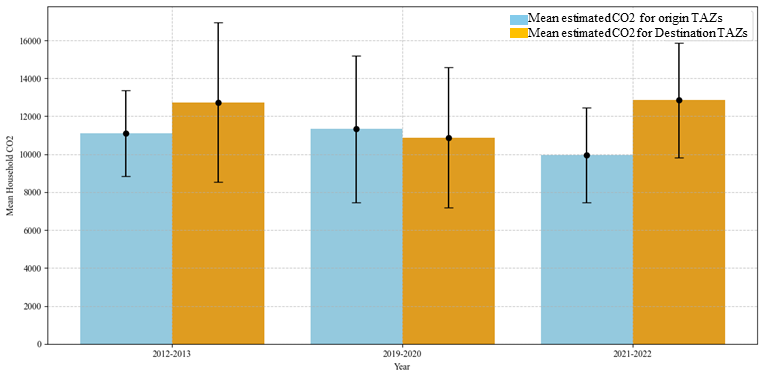

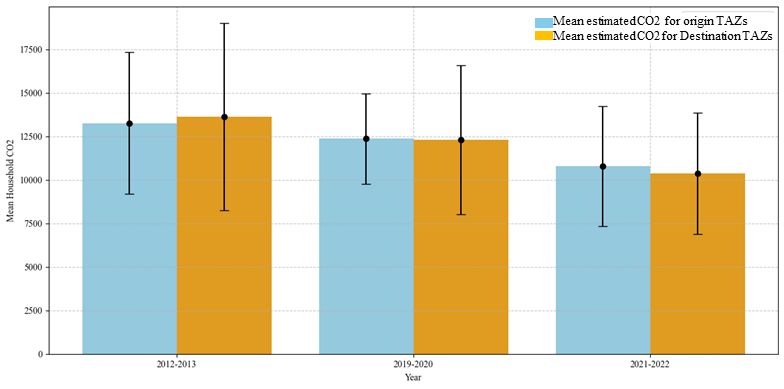


Figure A3: Year-wise pre-move and post-move mean household CO2 for different residential movement groups (Sensitivity Test)

**Appendix B: Validation of VMT Model Estimates Using Household Travel Survey Data from 2012 and 2023**

Table B1: Validation of the modeled VMT estimates based on actual travel survey data for 2012

| Residential movement pattern |  | Modeled VMT (mean) for 2023 | | | Actual VMT (mean) from 2023 UHTS | | |
| --- | --- | --- | --- | --- | --- | --- | --- |
|  | Pre | Post | Δ | Pre | Post | Δ |
| Moving out of the station areas | Displaced households | 23.74 | 36.47 | 12.73 | 39.13 | 43.71 | 4.58 |
| Moving into station areas | All households | 36.2 | 26.56 | (-9.64) | 49.37 | 47.15 | (-2.22) |

Table B2 : Validation of the modeled VMT estimates based on actual travel survey data for 2023

| Residential movement pattern | |  | Modeled VMT (mean) for 2023 | | | | | Actual VMT (mean) from 2012 UHTS | | | | | |
| --- | --- | --- | --- | --- | --- | --- | --- | --- | --- | --- | --- | --- | --- |
|  | Pre | Post | | Δ | | Pre | | Post | | | Δ |
| Moving out of the station areas | | Displaced households | | 23.74 | | 36.47 | | 12.73 | | 46.8 | | 66.39 | 19.59 | |
| Moving into  station area | | All households | 36.2 | 26.56 | | (-9.64) | | 58.97 | | 49.28 | | | (-9.69) |

**Appendix C. Selection of VMT model and it’s relative variable influences**

Table C1: Comparing model performance with 5-fold cross-validation

| Regression Model | R² Value | RMSE | MAE |
| --- | --- | --- | --- |
| Log-Log regression | 0.15 | 0.82 | 0.66 |
| Log-linear regression | 0.14 | 0.83 | 0.66 |
| XGBoost regressor | 0.20 | 0.86 | 0.67 |
| Random Forest regressor | 0.19 | 0.87 | 0.68 |
| AdaBoost regressor | 0.18 | 0.87 | 0.69 |

Table B2: relative importance of variables used in the XGBoost regressor

| **Categories** | **Variables** | **Relative Influence (%)** | **Total (%)** |
| --- | --- | --- | --- |
| Socio-economic | Household size | 18.10 | 51.17 |
| % household with 2 or more vehicles | 8.41 |
| % household with no vehicle | 5.00 |
| % renter households | 7.39 |
| % owner households | 5.84 |
| Median household income | 6.43 |
| Built environment | Access to jobs by transit | 17.95 | 48.83 |
| % 4-way intersection | 9.26 |
| Distance to downtown | 8.67 |
| Access to jobs by auto | 6.89 |
| Distance to nearest rail stop | 6.05 |

# **Appendix D: Changes in Household Proximity to Transit and City Centers Following Relocation (2012–2022)**

b. Moving out of station areas- displaced households

c. Moving into station areas- (all households)

b. Moving-out of station areas- (all households)


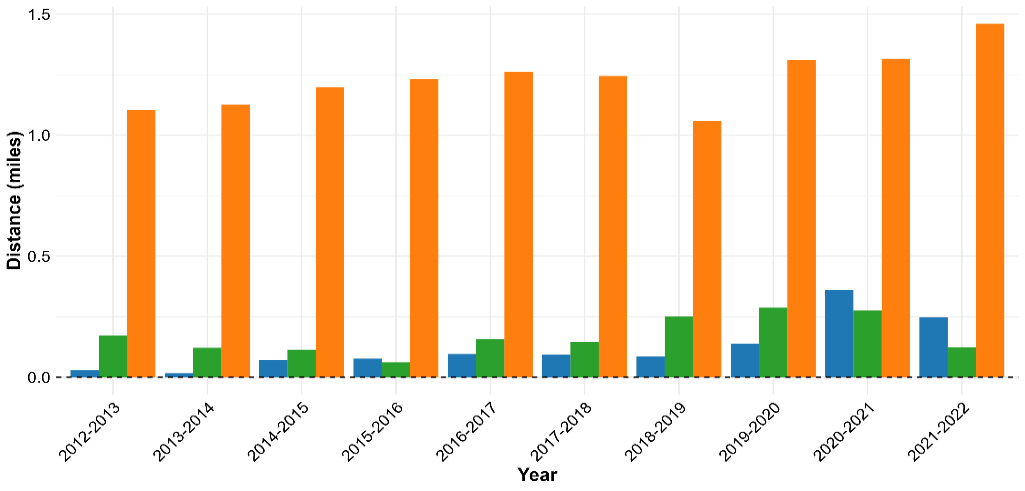

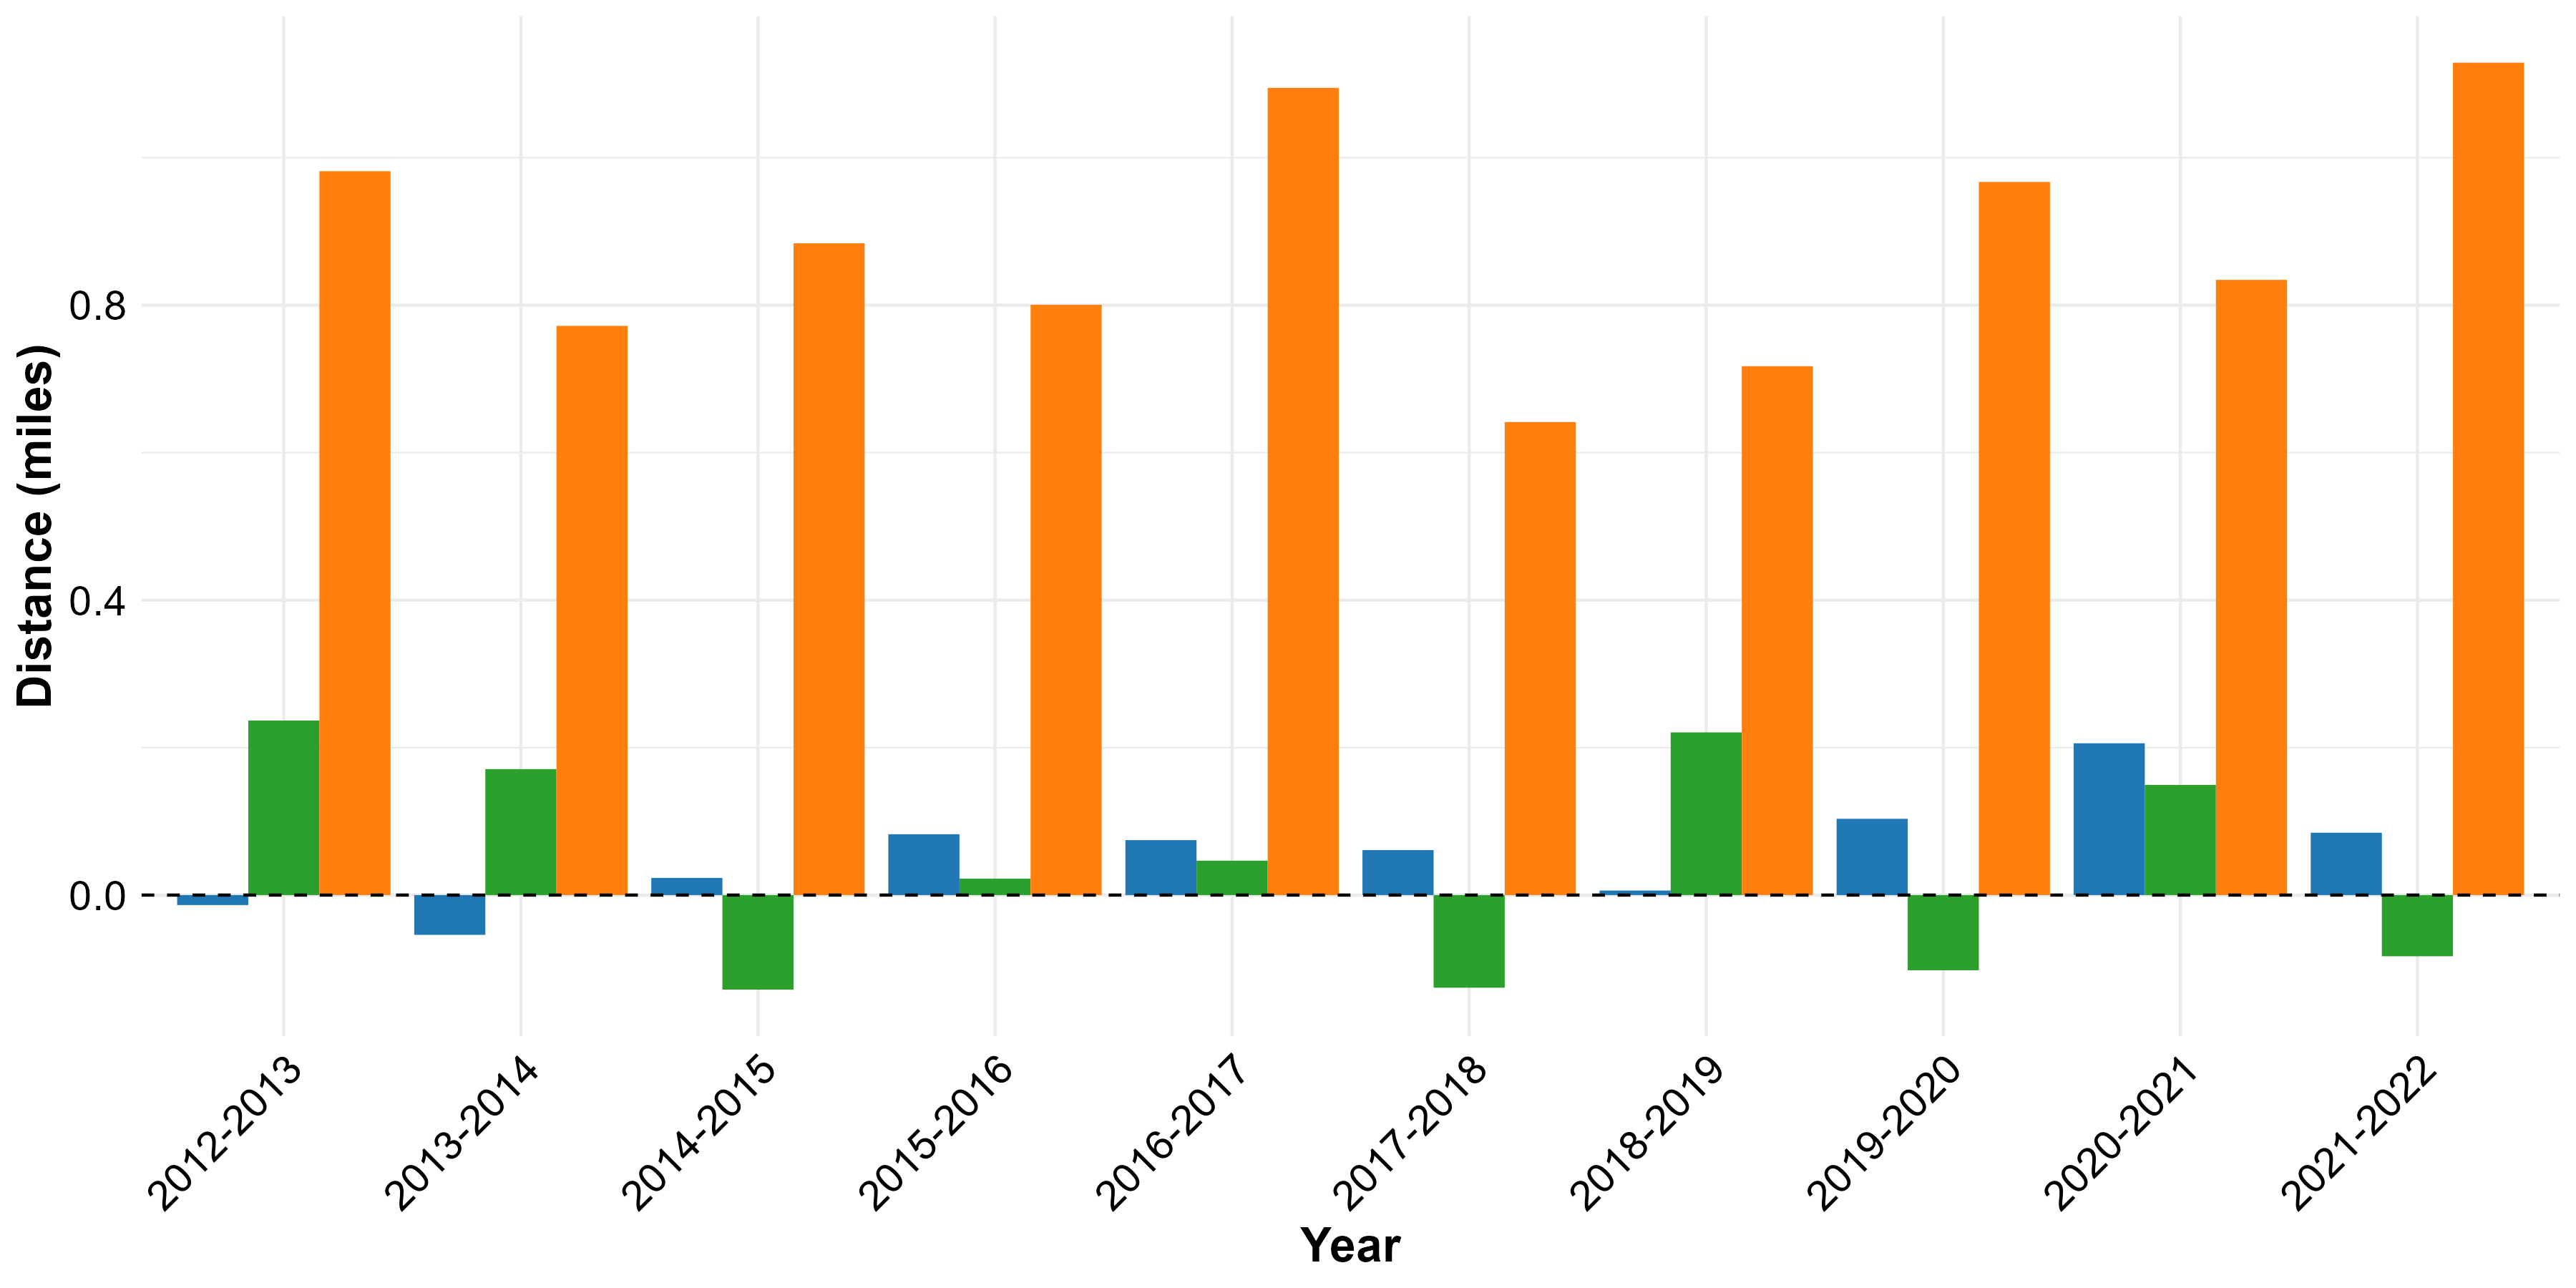

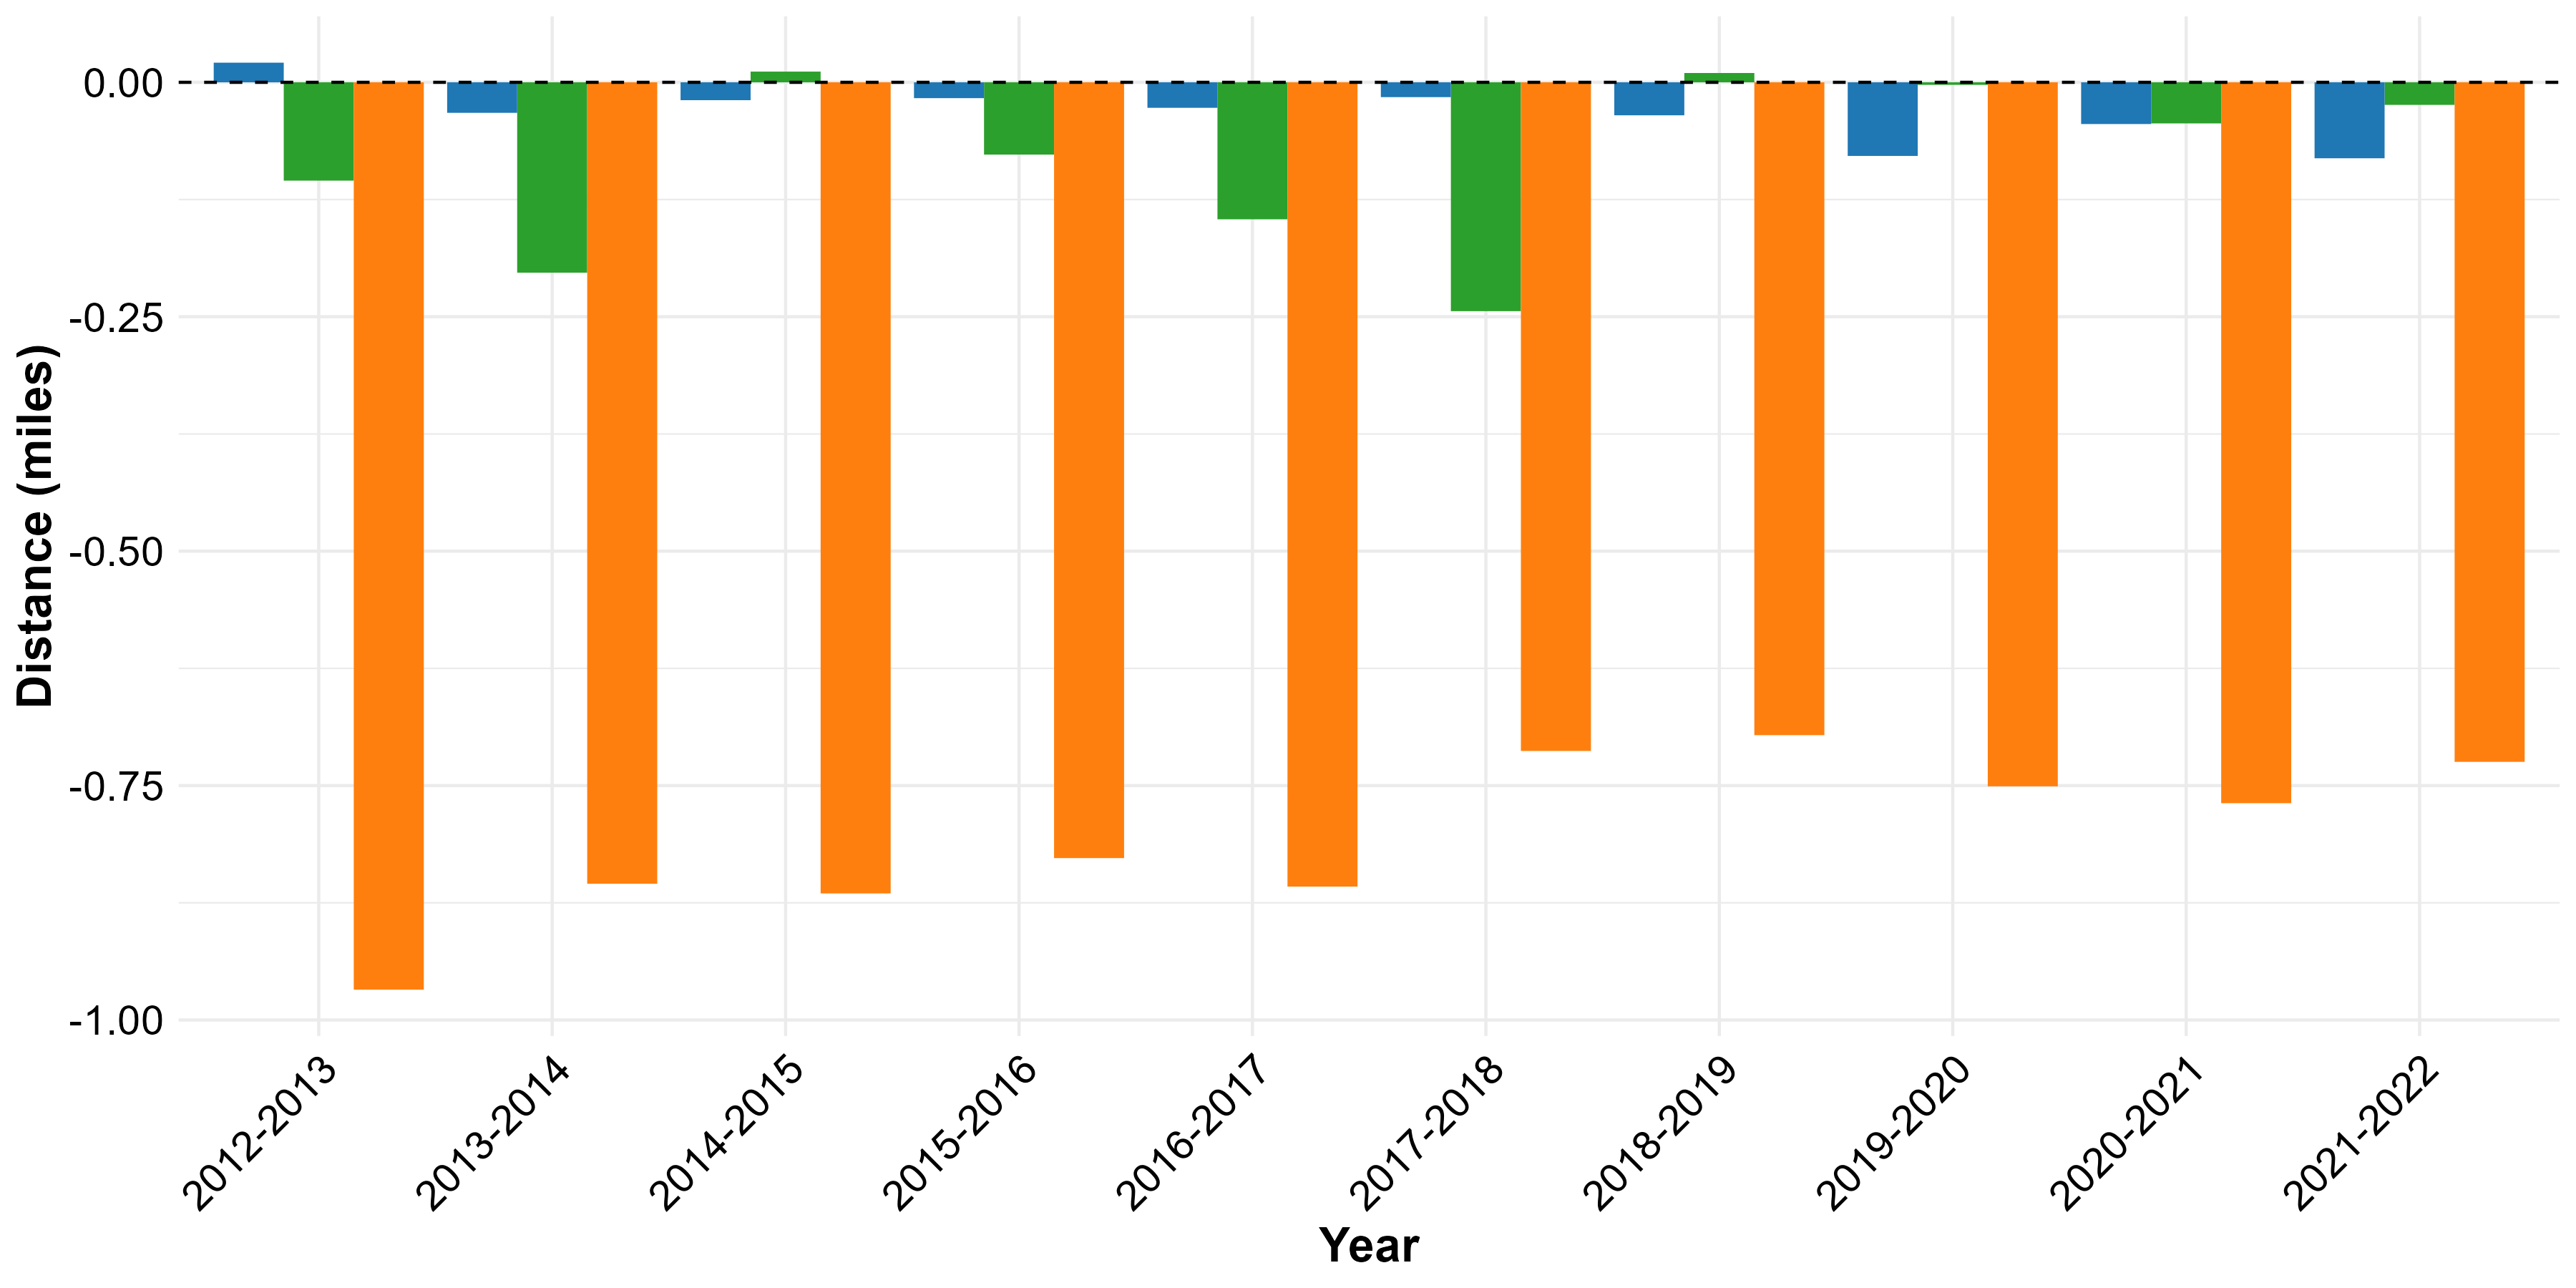

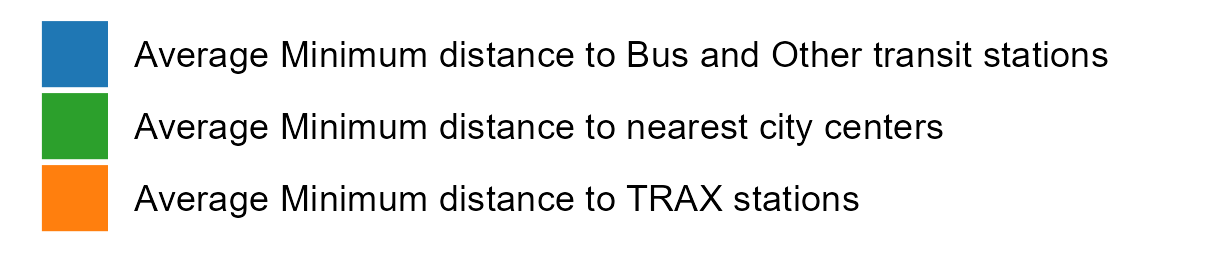


Figure C1: Year-wise mean difference in the distance to transit stops and city centers for different residential movement groups
